# Supplementary material for: Multilevel responses of adult zebrafish to crude and chemically dispersed oil exposure
Source: Springer Nature journal article supplement (doi:10.1186/s12302-021-00545-4), 2021-09-06
Supplement: MOESM1 [file 12302_2021_545_MOESM1_ESM.docx]

**Supplementary information**

**Multilevel responses of adult zebrafish to crude and chemically dispersed oil exposure**

Ada Esteban-Sáncheza,#, Sarah Johannb,#, Dennis Bilbaoc, Ailette Prietoc, Henner Hollertb Thomas-B. Seilerd,e, Amaia Orbeaa*.

aCBET research group, Dept. Zoology and Animal Cell Biology; Research Centre for Experimental Marine Biology and Biotechnology (PIE) & Science and Technology Faculty (STF), University of the Basque Country (UPV/EHU), Spain;

bDept. Evolutionary Ecology and Environmental Toxicology, Goethe University Frankfurt, Germany

cIBeA research group, Dept. Analytical Chemistry, PIE & STF, UPV/EHU, Spain;

d Dept Ecosystem Analysis, Institute for Environmental Research (Biology V), RWTH Aachen University, Germany;

e Ruhr District Institute of Hygiene, Gelsenkirchen, Germany

#First authors, these authors have contributed equally to this work.

*Corresponding author: amaia.orbea@ehu.eus

1. Chemical analysis of target PAHs in exposure solution and carcasses

Table S1. List of Abbreviations and limits of detection of target PAHs analyzed in exposure solutions and carcasses.

| **PAH** | **Abbreviation** | **Limit of detection – water (ng/L)** | **Limit of detection – fish (ng/g)** |
| --- | --- | --- | --- |
| Phenanthrene | Phen | 1.0 | 9.0 |
| Anthracene | Ant | 0.4 | 1.8 |
| Fluoranthene | Flr | 1.1 | 6.0 |
| Pyrene | Pyr | 1.3 | 4.2 |
| 11H-benzo[a]fluorene | 11H-B[a]Flu | 1.7 | 4.6 |
| 11H-benzo[b]fluorene | 11H-B[b]Flu | 1.3 | 5.1 |
| Benzo[a]anthracene | B[a]A | 1.8 | 4.3 |
| Chrysene | Chr | 1.8 |
| Benzo[b]fluoranthene | B[b]Flr | 3.2 | 3.6 |
| Benzo[k]fluoranthene | B[k]Flr | 2.9 | 3.0 |
| Benzo[a]pyrene | B[a]P | 2.3 | 3.3 |
| Benzo[e]pyrene | B[e]P | 2.8 | 3.5 |
| Indeno[1,2,3-cd]pyrene | Ind[1,2,3-cd]P | 10.5 | 3.0 |
| Dibenzo[a,h]anthracene | D[a,h]A | 8.6 | 7.2 |
| Benzo[g,h,i]perylene | B[g,h,i]Per | 4.5 | 5.4 |
| Dibenzo[a,e]pyrene | D[a,e]P | 5.2 | 6.1 |

Table S2. Concentrations of target PAHs (ng/L) in 5% WAFOIL exposure media over two cycles (exposure media was changed every 72 h) and analyzed using GC-MS. Values below detection limits are expressed as BDL.

|  | **Phen** | **Ant** | **Flr** | **Pyr** | **11H-**  **B[a]Flu** | **11H-B[b]Flu** | **B[a]A + Chr** |
| --- | --- | --- | --- | --- | --- | --- | --- |
| **6 h** | 160.6 | BDL | 11.3 | 53.5 | 11.5 | BDL | BDL |
| **12 h** | 91.2 | BDL | BDL | 41.1 | BDL | BDL | BDL |
| **24 h** | 69.2 | BDL | BDL | 34.5 | BDL | BDL | BDL |
| **36 h** | 37.5 | BDL | BDL | 9.7 | BDL | BDL | BDL |
| **48 h** | 19.6 | BDL | BDL | BDL | BDL | BDL | BDL |
| **60 h** | 20.1 | BDL | BDL | BDL | BDL | BDL | BDL |
| **72 h** | 16.8 | BDL | BDL | BDL | BDL | BDL | BDL |
| **78 h** | 135.1 | BDL | 11.7 | 52.4 | 12.7 | BDL | BDL |
| **84 h** | 53.5 | BDL | BDL | 22.7 | BDL | BDL | BDL |
| **96 h** | 57.2 | BDL | BDL | 17.1 | BDL | BDL | BDL |
| **108 h** | 24.6 | BDL | BDL | BDL | BDL | BDL | BDL |
| **120 h** | 26.0 | BDL | BDL | BDL | BDL | BDL | BDL |
| **132 h** | 18.3 | BDL | BDL | BDL | BDL | BDL | BDL |
| **144 h** | 18.4 | BDL | BDL | BDL | BDL | BDL | BDL |

Table S3. Concentrations of target PAHs (ng/L) in 25% WAFOIL exposure media over two cycles (exposure media was changed each 72 h) and analyzed using GC-MS. Values below detection limits are expressed as BDL. Note that the value at 6 h for the first cycle is missing due to technical problems.

|  | **Phen** | **Ant** | **Flr** | **Pyr** | **11H-**  **B[a]Flu** | **11H-**  **B[b]Flu** |
| --- | --- | --- | --- | --- | --- | --- |
| **12 h** | 1480.8 | BDL | 87.5 | 271.5 | 168.1 | 68.2 |
| **24 h** | 778.9 | BDL | 15.8 | 208.9 | 22.9 | 12.9 |
| **36 h** | 396.5 | BDL | BDL | 68.4 | BDL | BDL |
| **48 h** | 354.3 | BDL | BDL | 46.3 | BDL | BDL |
| **60 h** | 256.6 | BDL | BDL | 27.0 | BDL | BDL |
| **72 h** | 200.3 | BDL | BDL | 18.1 | BDL | BDL |
| **78 h** | 1289.9 | BDL | 30.4 | 182.3 | 47.5 | 26.5 |
| **84 h** | 1022.5 | BDL | 25.0 | 270.1 | 34.5 | 20.5 |
| **96 h** | 623.8 | BDL | 13.5 | 176.9 | 18.0 | 10.2 |
| **108 h** | 338.2 | BDL | BDL | 59.0 | BDL | BDL |
| **120 h** | 218.2 | BDL | BDL | 32.9 | BDL | BDL |
| **132 h** | 610.7 | BDL | BDL | 46.2 | BDL | BDL |
| **144 h** | 29.6 | BDL | BDL | 19.8 | BDL | BDL |

Table S4. Concentrations of target PAHs (ng/L) in 5% WAFOIL+D exposure media over two cycles (exposure media was changed each 72 h) and analyzed using GC-MS. Values below detection limits are expressed as BDL. Note that the value at 24 h for the first cycle and at 72 h for the second cycle are missing due to technical problems.

|  | **Phen** | **Ant** | **Flr** | **Pyr** | **11H- B[a]Flu** | **11H- B[b]Flu** | **B[a]A  + Chr** | **B[b]Flr** | **B[k]Flr** | **B[a]P** | **B[e]P** | **Ind[1,2,3-cd]P** | **D[a,h]A** | **B[g,h,i]Per** |
| --- | --- | --- | --- | --- | --- | --- | --- | --- | --- | --- | --- | --- | --- | --- |
| **6 h** | 2511.9 | BDL | 420.0 | 287.5 | 1119.9 | 529.4 | 719.6 | 80.2 | 15.5 | 107.5 | 37.4 | BDL | BDL | BDL |
| **12 h** | 1627.1 | BDL | 305.7 | 234.2 | 742.2 | 388.9 | 489.1 | 68.1 | 10.5 | 91.3 | 14.3 | BDL | BDL | BDL |
| **36 h** | 397.8 | BDL | 244.3 | 143.8 | 704.9 | 315.8 | 308.7 | 74.9 | BDL | 85.0 | 17.1 | BDL | BDL | 16.1 |
| **48 h** | 133.9 | BDL | 226.1 | 148.4 | 647.5 | 292.3 | 356.0 | 67.1 | BDL | 81.9 | 14.1 | BDL | BDL | 23.7 |
| **60 h** | BDL | BDL | 184.4 | 112.4 | 586.0 | 245.3 | 274.5 | 58.2 | BDL | 72.5 | 8.2 | BDL | 15.8 | 54.2 |
| **72 h** | BDL | BDL | 147.1 | 88.0 | 464.4 | 202.6 | 201.9 | 51.1 | BDL | 59.9 | 12.0 | BDL | 22.2 | 40.3 |
| **78 h** | 2836.9 | BDL | 408.7 | 298.4 | 914.6 | 515.6 | 478.9 | 68.4 | BDL | 93.8 | 27.3 | BDL | BDL | 16.9 |
| **84 h** | 2767.8 | BDL | 396.5 | 276.8 | 1035.0 | 513.2 | 535.6 | 85.6 | 15.8 | 112.8 | 32.4 | BDL | BDL | BDL |
| **96 h** | 2706.1 | BDL | 376.3 | 260.5 | 1011.1 | 466.1 | 528.5 | 105.9 | 13.9 | 127.5 | 29.8 | BDL | BDL | BDL |
| **108 h** | 1542.1 | BDL | 281.9 | 190.3 | 814.8 | 379.5 | 462.8 | 74.7 | 9.8 | 92.4 | 18.0 | BDL | BDL | BDL |
| **120 h** | BDL | BDL | 288.2 | 204.1 | 843.8 | 376.5 | 372.7 | 82.3 | BDL | 94.1 | 18.7 | BDL | BDL | 26.5 |
| **132 h** | BDL | BDL | 163.6 | 111.8 | 520.2 | 204.9 | 262.8 | 44.4 | BDL | 48.6 | 10.1 | BDL | BDL | BDL |

Table S5. Concentrations of PAHs (ng/g) in fish carcass tissue after 21 days of exposure to WAF dilutions of NNS crude oil. Fish were exposed to WAF dilutions of crude oil only (WAFOIL) and chemically dispersed crude oil (FINASOL OSR 52, WAFOIL+D). Values below detection limits are expressed as BDL.

|  | **Phen** | **Ant** | **Flr** | **Pyr** | **B[a]Flu** | **B[b]Flu** | **B[a]A  + Chr** | **B[b]Flr** | **B[k]Flr** | **B[a]P** | **B[e]P** | **Ind[1,2,3-cd]P** | **B[g,h,i]Per** |
| --- | --- | --- | --- | --- | --- | --- | --- | --- | --- | --- | --- | --- | --- |
| **Control** | 83.4 | BDL | 23.0 | 42.8 | BDL | BDL | 283.5 | BDL | BDL | BDL | BDL | 0.8 | 162.2 |
| **5% WAFOIL** | 52.3 | BDL | 23.5 | 123.1 | BDL | BDL | 198.0 | BDL | BDL | BDL | BDL | 1.7 | 106.4 |
| **25% WAFOIL** | 229.0 | 35.8 | 17.4 | 103.2 | BDL | BDL | 235.9 | BDL | BDL | BDL | BDL | 1.3 | 47.8 |
| **5% WAFOIL+D** | 782.1 | BDL | 238.4 | BDL | BDL | BDL | 604.0 | BDL | BDL | BDL | BDL | BDL | 215.2 |

2. Relative induction of biochemical biomarkers of exposure in adult zebrafish tissues

Table S6. Relative biochemical biomarker activity in brain, liver and gills of adult zebrafish after short- (3 d) and long-term (21 d) exposure to WAF dilutions of NNS crude oil. Fish were exposed to WAF dilutions of crude oil only (WAFOIL) and chemically dispersed (FINASOL OSR 52) crude oil (WAFOIL+D). Data represent the mean relative induction (IF) of acetylcholinesterase (AChE), 7-ethoxyresorufin-O-deethylase (EROD), glutathione S-transferase (GST) and catalase (CAT) in tissue homogenates of 4 replicates per treatment (1 replicate = pool of 3 individual tissues) compared to unexposed control with standard deviation.

|  | **3 days** | | | | | | | | **21 days** | | | | | | | |
| --- | --- | --- | --- | --- | --- | --- | --- | --- | --- | --- | --- | --- | --- | --- | --- | --- |
|  | **Control** | | **5% WAFOIL** | | **25% WAFOIL** | | **5% WAFOIL+D** | | **Control** | | **5% WAFOIL** | | **25% WAFOIL** | | **5% WAFOIL+D** | |
|  | mean IF | SD | mean IF | SD | mean IF | SD | mean IF | SD | mean IF | SD | mean IF | SD | mean IF | SD | mean IF | SD |
| **EROD liver** | 1.00 | 0.38 | 0.98 | .056 | 0.46 | 0.14 | 10.18 | 7.45 | 1.00 | 0.18 | 1.20 | 1.28 | 0.49 | 0.37 | 5.33 | 1.88 |
| **EROD gills** | 1.00 | 0.16 | 0.89 | 0.23 | 0.86 | 0.35 | 2.82 | 0.52 | 1.00 | 0.50 | 0,96 | 0.13 | 0.53 | 0.05 | 1.64 | 0.42 |
| **GST liver** | 1.00 | 0.15 | 0.81 | 0.05 | 1.06 | 0.30 | 1.03 | 0.32 | 1.00 | 0.11 | 1.40 | 0.16 | 1.30 | 0.12 | 1.30 | 0.05 |
| **GST gills** | 1.00 | 0.13 | 0.67 | 0.12 | 0.93 | 0.19 | 1.75 | 0.13 | 1.00 | 0.16 | 1.10 | 0.08 | 0.95 | 0.13 | 1.90 | 0.34 |
| **CAT liver** | 1.00 | 0.37 | 0.78 | 0.10 | 0.91 | 0.25 | 0.82 | 0.30 | 1.00 | 0.18 | 1.99 | 0.80 | 0.94 | 0.24 | 0.89 | 0.18 |
|  |  |  |  |  |  |  |  |  |  |  |  |  |  |  |  |  |
| **CAT gills** | 1.00 | 0.23 | 0.94 | 0.14 | 0.96 | 0.16 | 0.96 | 0.13 | 1.00 | 0.28 | 2.30 | 1.49 | 1.93 | 1.11 | 2.47 | 0.21 |
| **AChE brain** | 1.00 | 0.16 | 1.21 | 0.14 | 0.76 | 0.13 | 0.75 | 0.12 | 1.00 | 0.10 | 1.47 | 0.47 | 0.78 | 0.16 | 0.66 | 0.06 |

3. Relative induction of micronuclei in peripheral blood samples of adult zebrafish

Table S7. Relative micronucleus frequency (IF) in erythrocytes from adult zebrafish blood smears after short- (3 d) and long-term (21 d) exposure to WAF-dilutions of an NNS crude oil compared to unexposed to control. Data represent the mean IF of 7-10 individual fish exposed to WAF dilutions of crude oil only (WAFOIL) and chemically dispersed crude oil (FINASOL OSR 52, WAFOIL+D) with standard deviation (SD).

|  | **3 days** | | **21 days** | |
| --- | --- | --- | --- | --- |
|  | **mean IF** | **SD** | **mean IF** | **SD** |
| **5 % WAFOIL** | 1.21 | 0.72 | 0.93 | 0.55 |
| **25 % WAFOIL** | 0.83 | 0.46 | 1.20 | 0.84 |
| **5 % WAFOIL+D** | 0.82 | 0.40 | 2.20 | 1.06 |
